# Supplementary material
Source: Springer Nature journal article supplement (https://www.springermedizin.de/resource/supplementary/13601_2011_261_MOESM4_ESM.pdf/9677278)

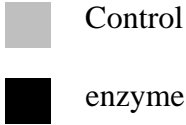

**gastric (phase 1)**

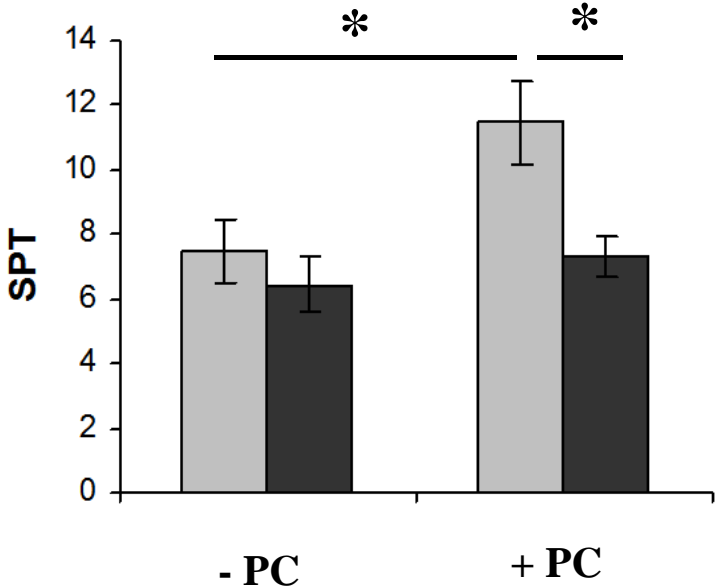

**Gastroduodenal (phase 1+2)**

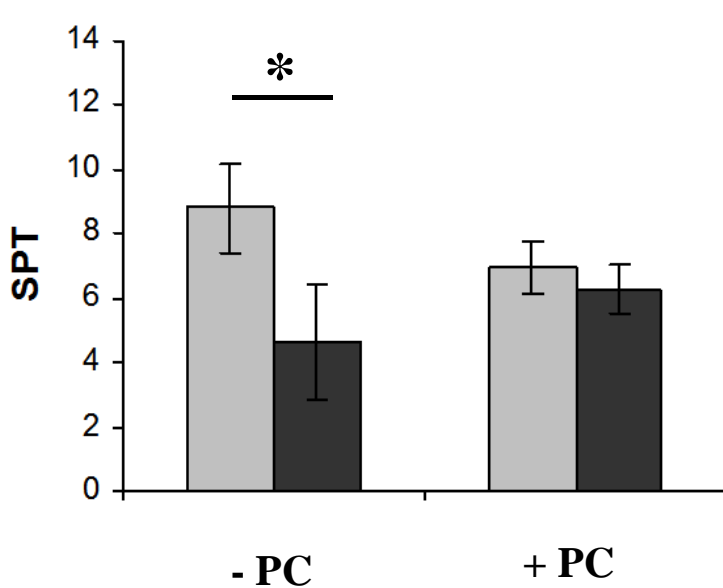

Supplement: MOESM4 [file 9677278]
